# Supplementary material for: DNAH6 and Its Interactions with PCD Genes in Heterotaxy and Primary Ciliary Dyskinesia
Source: PLOS journal article supplement (doi:10.1371/journal.pgen.1005821), 2016-02-26
Supplement: S12 (10.1371/journal.pgen.1005821.s012) [file journal.pgen.1005821.s012]

**Table S3 Summary of cilia defects with *DNAH6* knockdown**

| <b>Tissue</b>               | <b>Cilia Defects Observed<br/>with <i>DNAH6</i> Knockdown</b>            |
|-----------------------------|--------------------------------------------------------------------------|
| Zebrafish Kupffer's Vesicle | shorter cilia, largely immotile/dyskinetic                               |
| Human Nasal Epithelia       | sparse cilia, cilia of smaller caliper<br>mostly immotile/dyskinetic,    |
| Mouse Tracheal Epithelia    | sparse ciliation, most areas bald,<br>immotile/dyskinetic ciliary motion |
